# Supplementary material for: Prognostic Value of Machine Learning in Patients with Acute Myocardial Infarction
Source: MDPI journal article supplement (doi:10.3390/jcdd9020056), 2022-02-11
Supplement: s1 [file s1]

**Supplementary Material:**

# **Prognostic value of machine learning in patients with acute myocardial infarction**

**Changhu Xiao<sup>1</sup>, Yuan Guo<sup>1,2,3\*</sup>, Kaixuan Zhao<sup>1</sup>, Sha Liu<sup>1</sup>, Nongyue He<sup>1</sup>, Yi He<sup>2</sup>,**

**Shuhong Guo<sup>2</sup>, Zhu Chen<sup>1\*</sup>**

<sup>1</sup>Hunan Key Laboratory of Biomedical Nanomaterials and Devices, Hunan University

of Technology, Zhuzhou 412007, Hunan, PR China.

<sup>2</sup>Department of Cardiovascular Medicine, The Affiliated Zhuzhou Hospital Xiangya

Medical College, Central South University, Zhuzhou 412000, Hunan, PR China.

<sup>3</sup>Department of Cardiovascular Medicine, Xiangya Hospital, Central South University,

Changsha 410008, Hunan, China.

**\*Corresponding authors:**

Y. Guo, E-mail: [guoyuan8141@csu.edu.cn](mailto:guoyuan8141@csu.edu.cn)

Z. Chen, E-mail: [chenzhu220@163.com](mailto:chenzhu220@163.com)

## 1. Figures

**Figure S1.** Clinical feature selection

Recursive feature elimination with random decision forest was used to determine whether any subset of inputted features could be excluded. Once any one feature is removed, the area under the curve (AUC) is changed significantly in random decision forest, and the model discrimination is reduced in the test dataset.

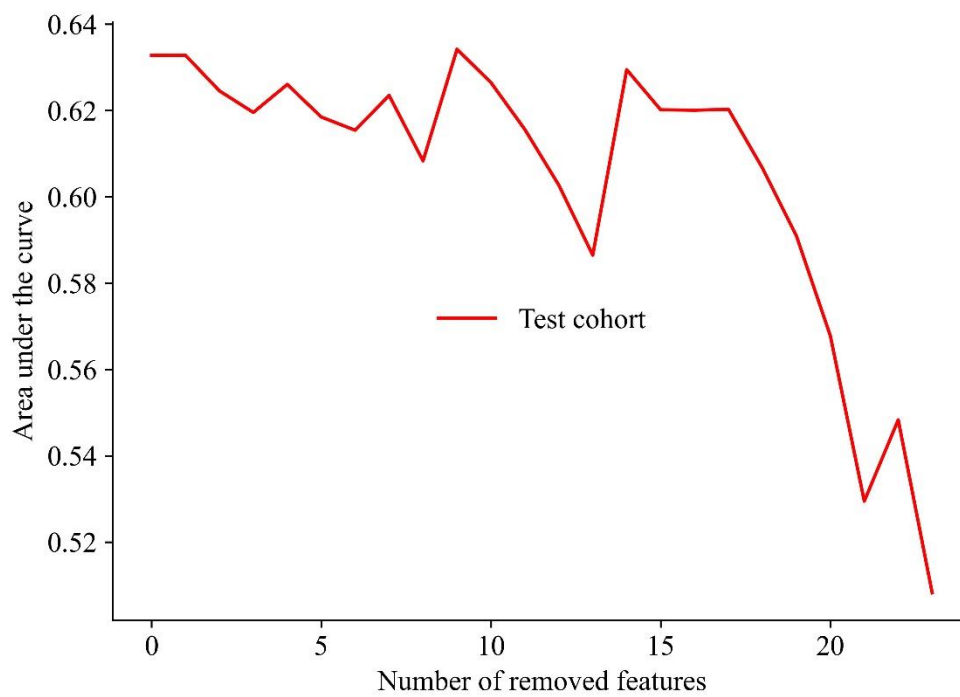

## 2. Tables

**Table S1.** Detailed information about the collected clinical features

| Features                                        | Status | Features                                 | Status | Features                                  | Status |
|-------------------------------------------------|--------|------------------------------------------|--------|-------------------------------------------|--------|
| Age, y                                          | √      | Glucose, mmol/L                          | √      | Troponin I, ng/L                          | ×      |
| Gender                                          | √      | White blood cells,<br>10 <sup>9</sup> /L | √      | Creatine kinase<br>isoenzyme, μg/L        | ×      |
| Follow-up time, d                               | √      | Neutrophils,<br>10 <sup>9</sup> /L       | √      | Creatine kinase,<br>μg/L                  | ×      |
| Coronary lesion<br>vessels, num                 | √      | Hypertension                             | √      | ApoA1, g/L                                | ×      |
| Number of stents<br>implanted                   | √      | Cigarettes                               | √      | D-dimer, ng/mL                            | ×      |
| Electrocardiogram,<br>(ST segment<br>elevation) | √      | Past medical<br>history                  | √      | Recurrence of<br>myocardial<br>infarction | ×      |
| Killip<br>classification, %                     | √      | Diabetes                                 | √      | Regularly<br>subsequent visit             | ×      |
| Cholesterol, mmol/L                             | √      | Drug compliance                          | √      | Early onset family<br>history             | ×      |
| Low density<br>lipoprotein, mmol/L              | √      | Revascularization<br>time, min           | √      | Dyslipidemia                              | ×      |
| C-reactive protein,                             | √      | Number of                                | √      | Cerebral apoplexy                         | ×      |

|                                       |   |                                   |   |                         |   |
|---------------------------------------|---|-----------------------------------|---|-------------------------|---|
| mg/L                                  |   | diseased vessels                  |   |                         |   |
| Left ventricular diameter, mm         | √ | Onset time of chest pain, h       | × | Size of left atrium, mm | × |
| Left ventricular ejection fraction, % | √ | Other diseased vessels, num       | × | Saccharification, %     | × |
| Creatinine, μmol/L                    | √ | B-type natriuretic peptide, pg/mL | × | Triglyceride, mmol/L    | × |
| Uric acid, μmol/L                     | √ | Troponin T, μg/L                  | × |                         |   |

√: The retained features, ×: The removed features.

**Table S2.** Hyper-parameters optimization using 5-fold cross validation

|                        | Hyper-parameter space                                                                                                                                                                                                                | Best combination of Hyperparameters                                                                                                        | AUC in validation set: mean (95% CI) |
|------------------------|--------------------------------------------------------------------------------------------------------------------------------------------------------------------------------------------------------------------------------------|--------------------------------------------------------------------------------------------------------------------------------------------|--------------------------------------|
| Random decision Forest | {'criterion': ['gini','entropy'],<br>'n_estimators': range (1,100),<br>'max_depth': range (1,100),<br>'min_samples_split':range(2,10),<br>'min_samples_leaf':range(1,10),<br>'max_features': [range(2,25)]}                          | {'criterion': 'gini',<br>'n_estimators':50,<br>'max_depth': 12,<br>'min_samples_leaf': 5,<br>'min_samples_split': 2,<br>'max_features': 3} | 0.749(0.644, 0.853)                  |
| Decision tree          | {'max_depth':range(2,20),<br>'max_features': range(2,25),<br>'criterion':['gini','entropy'],<br>'splitter': ['best','random'],<br>'min_samples_leaf':range(1,10),<br>'min_samples_split':range(2,10)}                                | {'max_depth': 6,<br>'max_features': 5,<br>'criterion': 'gini',<br>'splitter': 'best',<br>'min_samples_leaf': 6<br>'min_samples_split': 2}  | 0.664(0.488, 0.840)                  |
| Logistic Regression    | {'penalty': ['l1','l2'],<br>'dual'[True,False],<br>'solver': ['liblinear','lbfgs',<br>'newton-cg','sag','saga'],<br>'C': [0.01,0.05,0.1,0.5,1,5,10,50],<br>'fit_intercept': [True,False],<br>'intercept_scaling':[-0.5,0.5,1,1.5,2]} | {'penalty'='l2',<br>'dual'=False,<br>'solver'='lbfgs',<br>'C'=1,<br>'fit_intercept'=True,<br>'intercept_scaling'=0.5}                      | 0.717(0.692, 0.743)                  |

|              |                                      |                         |                     |
|--------------|--------------------------------------|-------------------------|---------------------|
|              | 'intercept_scaling':[0,0.5,1,1.5,2]} |                         |                     |
| Naive        |                                      |                         |                     |
| Bayes        |                                      |                         |                     |
| (GaussianNB) | None                                 | None                    | 0.733(0.650, 0.817) |
|              | { 'penalty': ['l2','l1'],            |                         |                     |
| Support      | 'dual': [True,False],                | { 'penalty '=' l2',     |                     |
| vector       | 'loss': ['squared_hinge','hinge'],   | 'dual'=True,            |                     |
| machine      | 'fit_intercept': [True,False],       | 'fit_intercept'=False,  | 0.717(0.687,0.746)  |
|              | 'C': [0.001,0.005,0.1,0.5,1,5,10]}   | 'C'=0.1}                |                     |
|              | { 'n_estimators':range(1,100),       |                         |                     |
|              | 'learning_rate': [0.001,0.005,0.01,  |                         |                     |
|              | 0.05,0.1,0.5,1],                     | { 'n_estimators': 31,   |                     |
|              | 'min_samples_split':range(2,10),     | 'learning_rate': 0.1,   |                     |
| Gradient     | 'min_samples_leaf':range(1,10),      | 'min_samples_leaf': 7,  |                     |
| Boosting     | 'max_features':                      | 'min_samples_split': 2, | 0.737(0.637,0.838)  |
|              | [range(2,24),'sqrt'],                | 'max_features': 'sqrt', |                     |
|              | 'max_depth':range(1,100),            | 'max_depth': 13,        |                     |
|              | 'subsample':[0.6,0.7,0.75,0.8,       | 'subsample': 1}         |                     |
|              | 0.85,0.9,0.95,1]}                    |                         |                     |
| MLP          | { 'neurons':range(6:20),             | { 'neurons': 15,        | 0.663(0.532,0.794)  |

---

|        |                                    |                   |
|--------|------------------------------------|-------------------|
| (one   | 'batch_size':range(4,33),          | 'batch_size': 28, |
| layer) | 'nb_epoch':range(10,30),           | 'nb_epoch': 15,   |
|        | 'lr': [0.001,0.01,0.05,            | 'lr': 1,          |
|        | 0.1,0.5,1,2.5,5],                  | 'momentums': 0.8} |
|        | 'momentums': [0.0,0.1,0.2,0.3,0.4, |                   |
|        | 0.5,0.6,0.7,0.8,0.9,1]]            |                   |

---

Code available: <https://github.com/PigEightZhu/AMI.git>

**Table S3.** Predictive performance of developed machine learning models and logistic regression in the test dataset

| Classifier             | F1-score | Accuracy | AUC  |
|------------------------|----------|----------|------|
| Logistic regression    | 0.49     | 0.55     | 0.62 |
| Decision tree          | 0.42     | 0.57     | 0.60 |
| Naive Bayes            | 0.49     | 0.62     | 0.64 |
| Support vector machine | 0.50     | 0.57     | 0.62 |
| Random forest          | 0.48     | 0.68     | 0.68 |
| Gradient boosting      | 0.42     | 0.68     | 0.64 |
| Multilayer perceptron  | 0        | 0.69     | 0.55 |



**Table S4.** The Brier score for model calibration

| Classifier             | Uncalibrated | Calibrated |
|------------------------|--------------|------------|
| Logistic regression    | 0.27         | 0.24       |
| Decision tree          | 0.30         | 0.19       |
| Naive Bayes            | 0.30         | 0.23       |
| Support vector machine | 0.23         | 0.23       |
| Random forest          | 0.21         | 0.22       |
| Gradient boosting      | 0.22         | 0.22       |
| Multilayer perceptron  | 0.24         | 0.33       |

Brier score is defined as the mean squared difference between the observed and the predicted outcome.
